# Supplementary material for: Serum Biomarkers in Carotid Artery Disease
Source: MDPI journal article supplement (doi:10.3390/diagnostics11112143), 2021-11-18
Supplement: s1 [file s1]

## Supplementary

**Table S1.** Serum biomarkers related to clinical outputs of carotid artery disease.

| Type of Biomarkers                       | Biomarkers      | Diagnosis of Carotid Artery Disease | Plaque Vulnerability | Symptomatic Carotid Artery Disease | Future Stroke Event | Stroke Severity | Cardiovascular Mortality |
|------------------------------------------|-----------------|-------------------------------------|----------------------|------------------------------------|---------------------|-----------------|--------------------------|
| Inflammatory                             | hs-CRP          | [1] [2, 3]                          | [4] [5]              |                                    | [6] [7] [8]         |                 | [9]                      |
|                                          | PTX 3           | [10] [11]                           | [5]                  |                                    |                     |                 |                          |
|                                          | IL-6            | [1] [12]                            | [4] [5]              |                                    |                     |                 |                          |
|                                          | TNF- $\alpha$   | [10]                                | [5] [13] [14]        | [15] [16]                          |                     |                 |                          |
| Cell and Endothelial Adhesion Biomarkers | NGAL            |                                     | [17]                 |                                    |                     |                 |                          |
|                                          | VCAM-1          |                                     | [5]                  |                                    |                     |                 | [18]                     |
|                                          | ICAM-1          | [12]                                |                      |                                    |                     |                 | [18]                     |
|                                          | E-selectin      | [12]                                | [5]                  |                                    |                     |                 |                          |
|                                          | L-selectin      |                                     | [13]                 |                                    |                     |                 |                          |
| Matrix or Degrading Proteolysis          | MMP-1           |                                     | [14]                 |                                    |                     |                 |                          |
|                                          | TIMP-1          |                                     | [14]                 |                                    |                     |                 |                          |
|                                          | MMP-2           |                                     | [19]                 | [20]                               |                     |                 |                          |
|                                          | MMP-3           | [12]                                |                      |                                    |                     |                 |                          |
|                                          | MMP-7           |                                     | [14] [19]            | [15]                               |                     |                 | [15]                     |
|                                          | MMP-9           | [12]                                | [20] [19] [21]       | [20]                               |                     |                 | [22]                     |
| Lipid Related                            | MMP-14          |                                     | [19]                 |                                    |                     |                 |                          |
|                                          | LDL-C           | [10]                                |                      |                                    | [23]                |                 |                          |
|                                          | TC              |                                     |                      |                                    | [23]                |                 |                          |
|                                          | triglyceride    |                                     |                      |                                    | [23]                |                 |                          |
|                                          | ox-LDL          |                                     | [24]                 | [21]                               | [25]                |                 | [26]                     |
|                                          | HDL-C           |                                     | [27] [28]            |                                    |                     | [29] [23]       |                          |
|                                          | TRL             | [30]                                | [31] [30]            |                                    |                     |                 |                          |
|                                          | Lp-PLA2         | [32]                                | [32] [8]             | [33]                               | [34] [35]           |                 |                          |
|                                          | apoA-I          |                                     |                      |                                    |                     | [36] [37]       |                          |
|                                          | apoE            |                                     |                      |                                    |                     |                 |                          |
| Metabolic Biomarkers                     | PCSK9           | [38]                                |                      |                                    |                     |                 |                          |
|                                          | restinin        |                                     | [39]                 | [39]                               |                     |                 |                          |
|                                          | adiponectin     | [40]                                |                      | [41] [42]                          |                     |                 |                          |
|                                          | leptin          |                                     |                      | [42]                               |                     |                 |                          |
|                                          | FABP4           | [43]                                | [43]                 | [43]                               |                     |                 |                          |
|                                          | homocysteine    | [44] [45]                           |                      |                                    | [45]                |                 |                          |
|                                          | osteoprotegerin |                                     | [46]                 | [46] [47]                          |                     |                 |                          |
|                                          | erin            |                                     |                      |                                    |                     |                 |                          |

**Table S2.** A summary of studies investigating biomarkers related to carotid artery disease diagnosis.

| Study                         | Biomarker                              | Methodology                                                       | Dataset                                                                      | Output                                                                                                                                                          |
|-------------------------------|----------------------------------------|-------------------------------------------------------------------|------------------------------------------------------------------------------|-----------------------------------------------------------------------------------------------------------------------------------------------------------------|
| Puz et al. [2]                | hs-CRP                                 | laboratory tests, ultrasound examination, statistical analysis    | 65 patients with ICA stenosis > 50% (39 symptomatic) and 30 healthy          | Patients with ICA stenosis had significantly higher serum concentrations and CRP values than the individuals from the control group (p = 0.009)                 |
| Horn et al. [3] (2009)        | hs-CRP                                 | laboratory tests, ultrasound examination, statistical analysis    | subclinical and advanced (INVADE study-n = 3,092, > 55 years)                | rate of both subclinical and advanced stages of atherosclerosis was higher in patients with pathological hs-CRP                                                 |
| Debing et al. [1] (2008)      | hs-CRP, IL-6, sVCAM-1                  | statistical analysis, high-resolution B-mode ultrasound           | 180 patients with ICA stenosis, 180 age-matched and sex-matched controls.    | levels of hs-CRP, sVCAM-1, and IL-6 in the CEA group were significantly higher than in the control group                                                        |
| Yi et al. [10] (2020)         | PTX 3, TNF- $\alpha$ , LDL-C           | computed tomography angiography (CTA), statistical analysis       | 206 patients with ischemic stroke                                            | plasma levels of PTX 3, TNF- $\alpha$ , and low-density lipoprotein cholesterol (LDL-C) were increased significantly in the CAS group patients vs. the CAS-free |
| Knoflach et al. [11] (2012)   | PTX 3                                  | statistical analysis, high-resolution B-mode ultrasound           | 132 young men, 205 young women, 562 individuals 55 to 94 years old           | PTX 3 level was independently associated with prevalent                                                                                                         |
| Biscetti et al. [12] (2015)   | IL-6, ICAM-1, E-selectin, MMP-3, MMP-9 | genetic association study                                         | 933 individuals (344 patients with ICAS-CEA endarterectomy and 589 controls) | IL-6, ICAM-1, MMP-3, and MMP-9 gene polymorphisms were independently associated with ICAS                                                                       |
| Kofoed et al. [30] (2002)     | TRL                                    | high-resolution B-mode ultrasound and computerized image analysis | 66 controls and 323 patients with carotid artery stenosis $\geq$ 50%         | fasting and postprandial triglyceride-rich lipoproteins are elevated in patients with carotid artery stenosis of $\geq$ 50%                                     |
| Chan et al. [38] (2016)       | PCSK-9                                 | biochemical analysis, carotid ultrasound                          | 95 asymptomatic subjects                                                     | serum PCSK-9 remained an independent predictor of mean carotid IMT                                                                                              |
| Saarikoski et al. [40] (2010) | adiponectin                            | ultrasound data on carotid IMT                                    | 2,147 young adults                                                           | low serum adiponectin concentration is independently related with increased carotid IMT early atherosclerosis                                                   |

| Study                                        | Biomarker    | Methodology                                                                    | Dataset                                                                  | Output                                                                                |
|----------------------------------------------|--------------|--------------------------------------------------------------------------------|--------------------------------------------------------------------------|---------------------------------------------------------------------------------------|
| Holm et al. [43] (2011)                      | FABP4        | enzyme immunoassay, statistical analyses                                       | 28 asymptomatic, 31 symptomatic, 202 patients with acute ischemic stroke | FABP4 levels were higher in patients with carotid atherosclerosis                     |
| Jia et al. [44] (2016)                       | homocysteine | carotid duplex ultrasound examination                                          | 5393 Chinese participants                                                | Hcy > 19.3 $\mu$ mol/L was considered as an independent indicator of asymptomatic CAS |
| Alsulaimani et al. [45] (plaque area) (2013) | homocysteine | ultrasonographic assessment of plaque morphology measured by gray-scale median | 1327 stroke-free subjects                                                | increasing Hcy was associated with an increasing risk                                 |

**Table S3.** A summary of studies investigating biomarkers related to carotid atherosclerotic plaque vulnerability

| Study                        | Biomarker                                   | Methodology                                                           | Dataset                                                                                    | Output                                                                                                                                                                      |
|------------------------------|---------------------------------------------|-----------------------------------------------------------------------|--------------------------------------------------------------------------------------------|-----------------------------------------------------------------------------------------------------------------------------------------------------------------------------|
| Yamagami et al. [4] (2004).  | hs-CRP, IL-6                                | statistical analyses                                                  | 246 patients, including 80 patients with a history of stroke/TIA                           | IL-6 and hs-CRP were negatively correlated with carotid plaque echogenicity                                                                                                 |
| Shindo et al. [5] (2014)     | hs-CRP, PTX 3, IL-6, TNF- $\alpha$ , VCAM-1 | histological analysis, statistical analysis                           | 58 patients with carotid stenosis                                                          | vulnerable group showed upregulation of proinflammatory cytokines, endothelial activation markers and inflammation markers. and downregulation of anti-inflammatory markers |
| Andersson et al. [13] (2009) | TNF- $\alpha$                               | ultrasound procedure, measurement serum markers, statistical analysis | 1,016 subjects                                                                             | Plaque size was also related to increased levels of TNF- $\alpha$                                                                                                           |
| Pelisek et al. [14] (2009)   | TNF- $\alpha$ , MMP-1, TIMP-1, MMP-7        | Measurement of serum markers by ELISA assays, Multiscore analysis     | patients (n = 101) were classified as histologically stable (n = 37) or unstable (n = 64). | Circulating levels of MMP-1, MMP-7, TIMP-1, and TNF- $\alpha$ were significantly enhanced in patients with unstable plaques                                                 |
| Guo et al. [19] (2018)       | MMP-2, MMP-7, MMP-14                        | carotid plaque specimens, histology and                               | 64 patients                                                                                | The mRNA levels of MMP-2, MMP-7, MMP-9 and MMP-14 were                                                                                                                      |

| Study                             | Biomarker   | Methodology                                                                                                        | Dataset                                                                                           | Output                                                                                                                               |
|-----------------------------------|-------------|--------------------------------------------------------------------------------------------------------------------|---------------------------------------------------------------------------------------------------|--------------------------------------------------------------------------------------------------------------------------------------|
|                                   |             | immunohistochemistry analysis                                                                                      |                                                                                                   | elevated in vulnerable plaques                                                                                                       |
| Alvarez et al. [20] (2004)        | MMP-9       | histopathologic analysis, immunohistochemistry (macrophage count, T lymphocytes, activated T lymphocytes)          | 40 patients with carotid artery stenosis                                                          | MMP-9 was also significantly higher in the symptomatic group and in patients with unstable plaques                                   |
| Eilenberg et al. [17] (2019)      | NGAL, MMP-9 | histological investigation, statistical analysis                                                                   | 83 patients with asymptomatic carotid artery stenosis                                             | Circulating NGAL and MMP-9/NGAL are significantly increased in asymptomatic patients with vulnerable carotid atherosclerotic plaques |
| Sarlon-Bartoli et al. [32] (2012) | Lp-PLA2     | laboratory measurements, histological assessment and immunohistochemistry of carotid plaques, statistical analyses | 42 patients (neurological symptoms were present in 16, unstable plaques in 23)                    | Plasma Lp-PLA2 level was independently associated with unstable carotid plaques                                                      |
| Yang et al. [8] (2017)            | Lp-PLA2     | laboratory examination, carotid ultrasonography and grouping, statistics analysis                                  | 100 patients with acute anterior circulation stroke and 50 noninfarction subjects (control group) | Hs-CRP and Lp-PLA2 levels were significantly higher in vulnerable plaque group than in mixed plaque group and stable plaque group    |
| K. Nishi et al. [24] (2002)       | Ox-LDL      | histopathological characteristics of plaques, immunohistochemical analysis, statistical analysis                   | 44 patients                                                                                       | The ox-LDL level was significantly higher in vulnerable than stable plaques                                                          |
| Mathiesen et al. [28] (2001)      | HDL-C       | ultrasonography, statistical Analysis                                                                              | 216 with carotid stenosis, 223 control subjects                                                   | Low levels of HDL-C are associated with an increased risk of having echolucent, rupture-prone atherosclerotic plaques                |
| Peters et al. [27] (2012)         | HDL-C       | measurement of intima-media thickness, statistical analysis                                                        | 984 individuals                                                                                   | Low levels of HDL-C are related to echolucency of the carotid intima-media                                                           |

| Study                           | Biomarker          | Methodology                                                                    | Dataset                                                                                                   | Output                                                                                                                                              |
|---------------------------------|--------------------|--------------------------------------------------------------------------------|-----------------------------------------------------------------------------------------------------------|-----------------------------------------------------------------------------------------------------------------------------------------------------|
| Nordestgaard et al. [31] (2003) | TRL, HDL           | ultrasound imaging methods, histological characterization                      | 111 asymptomatic, 135 symptomatic patients with carotid artery stenosis, 44 ipsilateral ischaemic strokes | Vulnerable plaques are associated with elevated levels of triglyceride-rich lipoproteins and with reduced levels of HDL                             |
| Kofoed et al. [30] (2002)       | TRL                | high-resolution B-mode ultrasound and computerized image analysis              | 66 controls and 323 patients with carotid artery stenosis $\geq 50\%$                                     | Fasting and postprandial triglyceride-rich lipoproteins are elevated in patients with carotid artery stenosis of $\geq 50\%$ compared with controls |
| Gasbarrino et al. [39] (2016)   | Restinin, Chemerin | association of circulating adipokines and carotid plaque instability           | n=165 symptomatic and asymptomatic patients                                                               | Low chemerin and high resistin levels were associated with plaque instability                                                                       |
| Holm et al. [43] (2011)         | FABP4              | enzyme immunoassay, statistical analyses                                       | 28 asymptomatic, 31 symptomatic, 202 acute ischemic stroke                                                | FABP4 is linked to plaque instability in patients with carotid atherosclerosis                                                                      |
| Davaine et al. [46] (2014)      | Osteoprotegerin    | OPG measurement, histological and immunological analyses, statistical analysis | 73 carotid plaques (49 asymptomatic and 24 symptomatic)                                                   | Circulating OPG levels were higher in the plasma of asymptomatic patients                                                                           |

**Table S4.** A summary of studies investigating biomarkers related to symptomatic carotid artery disease.

| Study                           | Biomarkers    | Methodology                                | Dataset                                                              | Output                                       |
|---------------------------------|---------------|--------------------------------------------|----------------------------------------------------------------------|----------------------------------------------|
| Abbas et al. [15] (2014)        | MMP-7         | immunohistochemistry, statistical analyses | 182 consecutive patients with moderate (50–69%), 23 healthy controls | MMP-7 could contribute to plaque instability |
| Schneiderman et al. [16] (2012) | TNF- $\alpha$ | lesion analysis, statistical analysis      | 40 symptomatic, 38 asymptomatic patients with                        | TNF- $\alpha$ was significantly increased in |

| Study                         | Biomarkers                   | Methodology                                                                                         | Dataset                                                  | Output                                                                         |
|-------------------------------|------------------------------|-----------------------------------------------------------------------------------------------------|----------------------------------------------------------|--------------------------------------------------------------------------------|
|                               |                              |                                                                                                     | progressive stenosis                                     | symptomatic patients                                                           |
| B. Alvarez et al. [20] (2004) | MMP-2, MMP-9                 | MMP-2 and MMP-9 measurement, statistical analysis                                                   | 40 patients with carotid artery stenosis                 | Elevated MMP-9 concentration is associated with carotid plaque instability     |
| Sigala et al. [21] (2010)     | Ox-LDL                       | Immunohistochemistry, data analysis and statistics                                                  | 36 patients undergoing endarterectomy, 20 controls       | Ox-LDL was increased in symptomatic patients                                   |
| Gasbarrino [61] (2016)        | Restinin                     | Measurement of circulation adipokines, data analysis and statistics                                 | 165 neurologically symptomatic and asymptomatic patients | resistin levels were significantly elevated in symptomatic                     |
| A. Schiro et al. [47] (2015)  | Osteopontin, Osteoprotegerin | Measurement of circulating EMPs, platelet MPs (PMPs) and inflammatory markers, statistical analysis | -                                                        | Osteopontin and osteoprotegerin were significantly elevated in the symptomatic |

**Table S5.** A summary of studies investigating biomarkers related to future stroke event.

| Study                  | Biomarkers | Methodology                                                                       | Dataset                                                                | Output                                                                                                 |
|------------------------|------------|-----------------------------------------------------------------------------------|------------------------------------------------------------------------|--------------------------------------------------------------------------------------------------------|
| Zhou et al. [6] (2016) | hs-CRP     | Meta-analysis                                                                     | 2436 ischemic strokes, 655 hemorrhagic strokes from 66,560 participant | When comparing the highest with the lowest hs-CRP category, the pooled RR of ischemic strokes was 1.46 |
| Yang et al. [8] (2017) | hs-CRP     | Laboratory examination, carotid ultrasonography and grouping, statistics analysis | 100 patients with acute anterior circulation stroke and 50 controls    | Hs-CRP and Lp-PLA2 are among the risk factors for anterior circulation stroke                          |

| Study                          | Biomarkers                      | Methodology                                                                                                                                | Dataset                                                                                                          | Output                                                                                                                                                             |
|--------------------------------|---------------------------------|--------------------------------------------------------------------------------------------------------------------------------------------|------------------------------------------------------------------------------------------------------------------|--------------------------------------------------------------------------------------------------------------------------------------------------------------------|
| Ma et al. [7]<br>(2020)        | hs-CRP, TNF- $\alpha$ ,<br>IL-6 | Data collection,<br>statistical analysis                                                                                                   | 288 ischemic stroke<br>patients and 300<br>controls                                                              | Hs-CRP, TNF- $\alpha$ , and IL-6 are<br>considered to<br>be important<br>markers of the<br>body's<br>inflammatory<br>state in<br>ischemic<br>stroke                |
| Gu et al. [23]<br>(2019)       | LDL-C, TC,<br>triglyceride      | Baseline information<br>collection, statistical<br>analysis                                                                                | Six cohort studies in<br>China with 267, 500<br>participants                                                     | TC, LDL-C,<br>and<br>triglyceride<br>showed<br>positive<br>associations<br>with ischemic<br>stroke                                                                 |
| Markstad et al. [25]<br>(2019) | Ox-LDL                          | Analyses of the<br>plaque tissue:<br>cytokines and<br>chemokines,<br>measurement of<br>sLOX-1 in blood<br>samples, statistical<br>analysis | 202 patients<br>undergoing carotid<br>endarterectomy                                                             | Ox-LDL<br>induces the<br>release of<br>sLOX-1 from<br>endothelial<br>cells and that                                                                                |
| Oei et al. [34]<br>(2005)      | Lp-PLA2                         | Measurement of Lp-<br>PLA2 activity,<br>statistical analysis                                                                               | 308 coronary heart<br>disease cases, 110<br>ischemic stroke<br>cases, and a random<br>sample of 1820<br>subjects | Lp-PLA2<br>activity is an<br>independent<br>predictor of<br>ischemic<br>stroke                                                                                     |
| Elkind et al. [35]<br>(2009)   | Lp-PLA2                         | Measurement of Lp-<br>PLA2 activity,<br>statistical analysis                                                                               | 467 patients                                                                                                     | Stroke patients<br>with Lp-PLA2<br>activity levels<br>in the highest<br>quartile had<br>an increased<br>risk of<br>recurrence<br>after first<br>ischemic<br>stroke |
| Alsulaimani et al. [45] (2013) | Homocysteine                    | Assessment of<br>homocysteine,<br>assessment of carotid                                                                                    | 1327 stroke-free<br>subjects                                                                                     | elevated<br>homocysteine<br>was                                                                                                                                    |

| Study                          | Biomarkers             | Methodology                              | Dataset | Output                                                                                                         |
|--------------------------------|------------------------|------------------------------------------|---------|----------------------------------------------------------------------------------------------------------------|
|                                |                        | atherosclerosis,<br>statistical analysis |         | independently<br>associated<br>with plaque<br>morphology                                                       |
| Gorgui et al. [62]<br>(2017)   | Adiponectin            | systematic review and<br>meta-analysis   | -       | increased<br>adiponectin<br>levels were<br>associated<br>with an<br>increase in risk<br>for ischemic<br>stroke |
| Gairolla et al. [63]<br>(2017) | Adiponectin,<br>leptin | systematic review                        | -       | levels of<br>adiponectin<br>and leptin are<br>significantly<br>associated<br>with ischemic<br>stroke           |

**Table S6.** A summary of studies investigating biomarkers related to cardiovascular mortality.

| Study                       | Biomarkers        | Methodology                                                            | Dataset                                                                                   | Output                                                                                                                                        |
|-----------------------------|-------------------|------------------------------------------------------------------------|-------------------------------------------------------------------------------------------|-----------------------------------------------------------------------------------------------------------------------------------------------|
| Mayer et al. [9]<br>(2016)  | hs-CRP            | Clinical and laboratory<br>data collection,<br>statistical analysis    | 1065 patients with<br>neurological<br>asymptomatic carotid<br>atherosclerosis             | The risk of all-cause<br>and cardiovascular<br>mortality<br>significantly<br>increased in patients<br>with elevated serum<br>levels of hs-CRP |
| Hoke et al.<br>[18] (2015)  | VCAM-1,<br>ICAM-1 | Measurement of cellular<br>adhesion molecules,<br>statistical analysis | 855 patients                                                                              | significant<br>association between<br>cardiovascular<br>mortality and<br>ICAM-1                                                               |
| Abbas et al.<br>[15] (2014) | MMP-7             | Immunohistochemistry,<br>statistical analyses                          | 182 consecutive<br>patients with<br>moderate (50–69%)<br>levels, 23 healthy<br>controls   | high plasma levels of<br>MMP-7 were<br>independently<br>associated with total<br>mortality                                                    |
| Zhong et al. [22]<br>(2017) | MMP-9             | Data collection,<br>statistical analysis                               | 3186 participants, 767<br>participants (24.6%)<br>experienced major<br>disability or died | Higher log MMP-9<br>was associated with<br>death and major<br>disability.                                                                     |
| Wang et al. [26]<br>(2017)  | Ox-LDL            | Biochemical indicators,<br>diagnosis of stroke and                     | 3688 patients                                                                             | Patients in the<br>highest ox-LDL                                                                                                             |



| Study                      | Biomarkers | Methodology                                               | Dataset                                                                                                | Output                                                                                            |
|----------------------------|------------|-----------------------------------------------------------|--------------------------------------------------------------------------------------------------------|---------------------------------------------------------------------------------------------------|
|                            |            | stroke subtype<br>classification, statistical<br>analysis |                                                                                                        | quartile had a higher<br>risk of 1-year stroke<br>mortality                                       |
| Holm et al. [43]<br>(2011) | FABP4      | Enzyme immunoassay,<br>statistical analyses               | asymptomatic (n = 28),<br>symptomatic (n = 31),<br>patients with acute<br>ischemic stroke (n =<br>202) | levels of FABP4 were<br>significantly<br>associated with total<br>and cardiovascular<br>mortality |

Table S7: Biomarkers related with different clinical outputs of carotid artery disease in i)Symptomatic, Asymptomatic & Controls, ii) Asymptomatic, iii) Symptomatic and in iv) General population

| <b>i) Symptomatic, Asymptomatic &amp; Controls</b>                                                   |                                                                                                                                                                                    |
|------------------------------------------------------------------------------------------------------|------------------------------------------------------------------------------------------------------------------------------------------------------------------------------------|
| <i>Carotid Artery Disease Diagnosis</i>                                                              | hs-CRP [2] [3] [1], IL-6 [1] [12], sVCAM-1 [1], ICAM-1 [12], E-selectin [12], MMP-3 [12], MMP-9 [12], TRL [30], FABP4 [43]                                                         |
| <i>Carotid Atherosclerotic Plaque Vulnerability</i>                                                  | hs-CRP [4] , IL-6 [4], TRL [31] [30], HDL [31] [28], Restinin [39], Chemerin [39], FABP4 [43], Osteoprotegerin [46], Lp-PLA2 [32] ,TNF-a [14], MMP-1 [14], TIMP-1 [14], MMP-7 [14] |
| <i>Symptomatic Carotid Artery Disease</i>                                                            | MMP-7 [15], TNF- $\alpha$ [16] [7], hs-CRP [7], IL-6 [7], Ox-LDL [21], Restinin [61]                                                                                               |
| <i>Cardiovascular Mortality</i>                                                                      | MMP-7 [15], FABP4 [43]                                                                                                                                                             |
| <b>ii) Asymptomatic</b>                                                                              |                                                                                                                                                                                    |
| <i>Carotid Artery Disease Diagnosis</i>                                                              | PCSK-9 [38], homocysteine [45]                                                                                                                                                     |
| <i>Carotid Atherosclerotic Plaque Vulnerability</i>                                                  | NGAL [17], MMP-9 [17]                                                                                                                                                              |
| <i>Future Stroke Event</i>                                                                           | Homocysteine [45]                                                                                                                                                                  |
| <i>Cardiovascular mortality</i>                                                                      | hs-CRP [9]                                                                                                                                                                         |
| <b>iii) Symptomatic patients (either with diagnosis of carotid artery disease or undergoing CEA)</b> |                                                                                                                                                                                    |
| <i>Carotid Artery Disease Diagnosis</i>                                                              | PTX 3 [10], TNF-a [10], LDL-C [10]                                                                                                                                                 |
| <i>Carotid Atherosclerotic Plaque Vulnerability</i>                                                  | MMP-9 [20], Lp-PLA2 [8]                                                                                                                                                            |
| <i>Future Stroke Event.</i>                                                                          | hs-CRP [6] [8], MMP-2 [20], MMP-9 [20], Ox-LDL [25], Lp-PLA2 [34]                                                                                                                  |
| <b>iv) General population</b>                                                                        |                                                                                                                                                                                    |
| <i>Carotid Artery Disease Diagnosis</i>                                                              | Adiponectin [40], homocysteine [44], PTX 3 [11]                                                                                                                                    |
| <i>Carotid Atherosclerotic Plaque Vulnerability</i>                                                  | MMP-2 [19], MMP-7 [19], MMP-14 [19], Ox-LDL [24], HDL-C [27], TNF-a [13]                                                                                                           |
| <i>Future Stroke Event.</i>                                                                          | LDL-C [23], TC [23], triglycerides [23], Lp-PLA2 [35]                                                                                                                              |
| <i>Cardiovascular Mortality</i>                                                                      | MMP-9 [22], Ox-LDL [26], VCAM-1 [18], ICAM-1 [18]                                                                                                                                  |

## References

- [1] E. Debing, E. Peeters, C. Demanet, M. De Waele, and P. Van den Brande, "Markers of inflammation in patients with symptomatic and asymptomatic carotid artery stenosis: a case-control study," *Vascular and endovascular surgery*, vol. 42, pp. 122-127, 2008.
- [2] P. Puz, A. Lasek-Bal, D. Ziaja, Z. Kazibutowska, and K. Ziaja, "Inflammatory markers in patients with internal carotid artery stenosis," *Archives of medical science: AMS*, vol. 9, p. 254, 2013.
- [3] C. S. Horn, R. Ilg, K. Sander, H. Bickel, C. Briesenick, B. Hemmer, *et al.*, "High-sensitivity C-reactive protein at different stages of atherosclerosis: results of the INVADE study," *Journal of neurology*, vol. 256, pp. 783-791, 2009.
- [4] H. Yamagami, K. Kitagawa, Y. Nagai, H. Hougaku, M. Sakaguchi, K. Kuwabara, *et al.*, "Higher levels of interleukin-6 are associated with lower echogenicity of carotid artery plaques," *Stroke*, vol. 35, pp. 677-681, 2004.
- [5] A. Shindo, H. Tanemura, K. Yata, K. Hamada, M. Shibata, Y. Umeda, *et al.*, "Inflammatory biomarkers in atherosclerosis: pentraxin 3 can become a novel marker of plaque vulnerability," *PloS one*, vol. 9, p. e100045, 2014.
- [6] Y. Zhou, W. Han, D. Gong, C. Man, and Y. Fan, "Hs-CRP in stroke: a meta-analysis," *Clinica chimica acta*, vol. 453, pp. 21-27, 2016.
- [7] Z. Ma, Y. Yue, Y. Luo, W. Wang, Y. Cao, and Q. Fang, "Clinical utility of the inflammatory factors combined with lipid markers in the diagnostic and prognostic assessment of ischemic stroke: Based on logistic regression models," *Journal of Stroke and Cerebrovascular Diseases*, vol. 29, p. 104653, 2020.
- [8] X. Liu, G. Wu, C. Xu, Y. He, L. Shu, Y. Liu, *et al.*, "Prediction of coronary plaque progression using biomechanical factors and vascular characteristics based on computed tomography angiography," *Computer Assisted Surgery*, vol. 22, pp. 286-294, 2017.
- [9] F. J. Mayer, C. J. Binder, O. F. Wagner, M. Schillinger, E. Minar, W. Mlekusch, *et al.*, "Combined effects of inflammatory status and carotid atherosclerosis: a 12-year follow-up study," *Stroke*, vol. 47, pp. 2952-2958, 2016.
- [10] L. Yi, J. Tang, C. Shi, T. Zhang, J. Li, F. Guo, *et al.*, "Pentraxin 3, TNF- $\alpha$ , and LDL-C are associated with carotid artery stenosis in patients with ischemic stroke," *Frontiers in neurology*, vol. 10, p. 1365, 2020.
- [11] M. Knoflach, S. Kiechl, A. Mantovani, I. Cuccovillo, B. Bottazzi, Q. Xu, *et al.*, "Pentraxin-3 as a marker of advanced atherosclerosis results from the Bruneck, ARMY and ARFY Studies," *PloS one*, vol. 7, p. e31474, 2012.
- [12] F. Biscetti, G. Straface, G. Bertoletti, C. Vincenzoni, F. Snider, V. Arena, *et al.*, "Identification of a potential proinflammatory genetic profile influencing carotid plaque vulnerability," *Journal of Vascular Surgery*, vol. 61, pp. 374-381, 2015.
- [13] J. Andersson, J. Sundström, L. Kurland, T. Gustavsson, J. Hulthe, A. Elmgren, *et al.*, "The carotid artery plaque size and echogenicity are related to different cardiovascular risk factors in the elderly: the Prospective Investigation of the Vasculature in Uppsala Seniors (PIVUS) study," *Lipids*, vol. 44, p. 397, 2009.

- [14] J. Pelisek, M. Rudelius, P. Zepper, H. Poppert, C. Reeps, T. Schuster, *et al.*, "Multiple biological predictors for vulnerable carotid lesions," *Cerebrovascular Diseases*, vol. 28, pp. 601-610, 2009.
- [15] A. Abbas, P. Aukrust, D. Russell, K. Krohg-Sørensen, T. Almås, D. Bundgaard, *et al.*, "Matrix metalloproteinase 7 is associated with symptomatic lesions and adverse events in patients with carotid atherosclerosis," *PloS one*, vol. 9, p. e84935, 2014.
- [16] J. Schneiderman, K. Schaefer, F. D. Kolodgie, N. Savion, S. Kotev-Emeth, R. Dardik, *et al.*, "Leptin locally synthesized in carotid atherosclerotic plaques could be associated with lesion instability and cerebral emboli," *Journal of the American Heart Association*, vol. 1, p. e001727, 2012.
- [17] W. Eilenberg, S. Stojkovic, A. Kaider, A. Piechota-Polanczyk, J. Nanobachvili, C. M. Domenig, *et al.*, "Neutrophil gelatinase associated lipocalin (NGAL) for identification of unstable plaques in patients with asymptomatic carotid stenosis," *European Journal of Vascular and Endovascular Surgery*, 2019.
- [18] M. Hoke, M.-P. Winter, O. Wagner, M. Exner, M. Schillinger, Z. Arnold, *et al.*, "The impact of selectins on mortality in stable carotid atherosclerosis," *Thrombosis and haemostasis*, vol. 114, pp. 632-638, 2015.
- [19] Z. Y. Guo, B. Zhang, Y. H. Yan, S. S. Gao, J. J. Liu, L. Xu, *et al.*, "Specific matrix metalloproteinases and calcification factors are associated with the vulnerability of human carotid plaque," *Experimental and therapeutic medicine*, vol. 16, pp. 2071-2079, 2018.
- [20] B. Alvarez, C. Ruiz, P. Chacón, J. Alvarez-Sabin, and M. Matas, "Serum values of metalloproteinase-2 and metalloproteinase-9 as related to unstable plaque and inflammatory cells in patients with greater than 70% carotid artery stenosis," *Journal of vascular surgery*, vol. 40, pp. 469-475, 2004.
- [21] F. Sigala, A. Kotsinas, P. Savari, K. Filis, S. Markantonis, E. K. Iliodromitis, *et al.*, "Oxidized LDL in human carotid plaques is related to symptomatic carotid disease and lesion instability," *Journal of vascular surgery*, vol. 52, pp. 704-713, 2010.
- [22] C. Zhong, J. Yang, T. Xu, T. Xu, Y. Peng, A. Wang, *et al.*, "Serum matrix metalloproteinase-9 levels and prognosis of acute ischemic stroke," *Neurology*, vol. 89, pp. 805-812, 2017.
- [23] X. Gu, Y. Li, S. Chen, X. Yang, F. Liu, Y. Li, *et al.*, "Association of lipids with ischemic and hemorrhagic stroke: a prospective cohort study among 267 500 Chinese," *Stroke*, vol. 50, pp. 3376-3384, 2019.
- [24] K. Nishi, H. Itabe, M. Uno, K. T. Kitazato, H. Horiguchi, K. Shinno, *et al.*, "Oxidized LDL in carotid plaques and plasma associates with plaque instability," *Arteriosclerosis, thrombosis, and vascular biology*, vol. 22, pp. 1649-1654, 2002.
- [25] H. Markstad, A. Edsfeldt, I. Yao Mattison, E. Bengtsson, P. Singh, M. Cavalera, *et al.*, "High levels of soluble lectinlike oxidized low-density lipoprotein receptor-1 are associated with carotid plaque inflammation and increased risk of ischemic stroke," *Journal of the American Heart Association*, vol. 8, p. e009874, 2019.
- [26] A. Wang, Y. Yang, Z. Su, W. Yue, H. Hao, L. Ren, *et al.*, "Association of oxidized low-density lipoprotein with prognosis of stroke and stroke subtypes," *Stroke*, vol. 48, pp. 91-97, 2017.

- [27] S. Peters, L. Lind, M. Palmer, D. Grobbee, J. Crouse III, D. O'Leary, *et al.*, "Increased age, high body mass index and low HDL-C levels are related to an echolucent carotid intima-media: the METEOR study," *Journal of internal medicine*, vol. 272, pp. 257-266, 2012.
- [28] E. B. Mathiesen, K. H. Bønaa, and O. Joakimsen, "Low levels of high-density lipoprotein cholesterol are associated with echolucent carotid artery plaques: the Tromsø study," *Stroke*, vol. 32, pp. 1960-1965, 2001.
- [29] P.-S. Yeh, C.-M. Yang, S.-H. Lin, W.-M. Wang, P.-S. Chen, T.-H. Chao, *et al.*, "Low levels of high-density lipoprotein cholesterol in patients with atherosclerotic stroke: a prospective cohort study," *Atherosclerosis*, vol. 228, pp. 472-477, 2013.
- [30] S. C. Kofoed, M.-L. M. Grønholdt, J. Bismuth, J. E. Wilhjelm, H. Sillesen, and B. G. Nordestgaard, "Echolucent, rupture-prone carotid plaques associated with elevated triglyceride-rich lipoproteins, particularly in women," *Journal of vascular surgery*, vol. 36, pp. 783-792, 2002.
- [31] B. G. Nordestgaard, M.-L. M. Grønholdt, and H. Sillesen, "Echolucent rupture-prone plaques," *Current opinion in lipidology*, vol. 14, pp. 505-512, 2003.
- [32] G. Sarlon-Bartoli, A. Boudes, C. Buffat, M. Bartoli, M. Piercecchi-Marti, E. Sarlon, *et al.*, "Circulating lipoprotein-associated phospholipase A2 in high-grade carotid stenosis: a new biomarker for predicting unstable plaque," *European Journal of Vascular and Endovascular Surgery*, vol. 43, pp. 154-159, 2012.
- [33] D. Mannheim, J. Herrmann, D. Versari, M. Gössl, F. B. Meyer, J. P. McConnell, *et al.*, "Enhanced expression of Lp-PLA2 and lysophosphatidylcholine in symptomatic carotid atherosclerotic plaques," *Stroke*, vol. 39, pp. 1448-1455, 2008.
- [34] H.-H. S. Oei, I. M. Van Der Meer, A. Hofman, P. J. Koudstaal, T. Stijnen, M. M. Breteler, *et al.*, "Lipoprotein-associated phospholipase A2 activity is associated with risk of coronary heart disease and ischemic stroke: the Rotterdam Study," *Circulation*, vol. 111, pp. 570-575, 2005.
- [35] M. S. Elkind, W. Tai, K. Coates, M. C. Paik, and R. L. Sacco, "Lipoprotein-associated phospholipase A2 activity and risk of recurrent stroke," *Cerebrovascular Diseases*, vol. 27, pp. 42-50, 2009.
- [36] K. B. Walsh, K. Hart, S. Roll, M. Sperling, D. Unruh, W. S. Davidson, *et al.*, "Apolipoprotein AI and paraoxonase-1 are potential blood biomarkers for ischemic stroke diagnosis," *Journal of Stroke and Cerebrovascular Diseases*, vol. 25, pp. 1360-1365, 2016.
- [37] H. Dong, W. Chen, X. Wang, F. Pi, Y. Wu, S. Pang, *et al.*, "Apolipoprotein A1, B levels, and their ratio and the risk of a first stroke: a meta-analysis and case-control study," *Metabolic brain disease*, vol. 30, pp. 1319-1330, 2015.
- [38] D. C. Chan, J. Pang, B. McQuillan, J. Hung, J. P. Beilby, P. H. R. Barrett, *et al.*, "Plasma proprotein convertase subtilisin kexin type 9 as a predictor of carotid atherosclerosis in asymptomatic adults," *Heart, Lung and Circulation*, vol. 25, pp. 520-525, 2016.
- [39] K. Gasbarrino, C. Mantzoros, J. Gorgui, J. P. Veinot, C. Lai, and S. S. Daskalopoulou, "Circulating chemerin is associated with carotid plaque instability, whereas resistin is

- related to cerebrovascular symptomatology," *Arteriosclerosis, thrombosis, and vascular biology*, vol. 36, pp. 1670-1678, 2016.
- [40] L. A. Saarikoski, R. K. Huupponen, J. S. Viikari, J. Marniemi, M. Juonala, M. Kähönen, *et al.*, "Adiponectin is related with carotid artery intima-media thickness and brachial flow-mediated dilatation in young adults—the Cardiovascular Risk in Young Finns Study," *Annals of medicine*, vol. 42, pp. 603-611, 2010.
  - [41] J. Gorgui, K. Gasbarrino, M. K. Georgakis, M. A. Karalexi, B. Nauche, E. T. Petridou, *et al.*, "Circulating adiponectin levels in relation to carotid atherosclerotic plaque presence, ischemic stroke risk, and mortality: a systematic review and meta-analyses," *Metabolism*, vol. 69, pp. 51-66, 2017.
  - [42] J. Gairolla, R. Kler, M. Modi, and D. Khurana, "Leptin and adiponectin: pathophysiological role and possible therapeutic target of inflammation in ischemic stroke," *Reviews in the Neurosciences*, vol. 28, pp. 295-306, 2017.
  - [43] S. Holm, T. Ueland, T. B. Dahl, A. E. Michelsen, M. Skjelland, D. Russell, *et al.*, "Fatty Acid binding protein 4 is associated with carotid atherosclerosis and outcome in patients with acute ischemic stroke," *PLoS One*, vol. 6, p. e28785, 2011.
  - [44] J. Jia, A. Wang, J. Wang, J. Wu, X. Yan, Y. Zhou, *et al.*, "Homocysteine and its relationship to asymptomatic carotid stenosis in a Chinese community population," *Scientific reports*, vol. 6, pp. 1-7, 2016.
  - [45] S. Alsulaimani, H. Gardener, M. S. Elkind, K. Cheung, R. L. Sacco, and T. Rundek, "Elevated homocysteine and carotid plaque area and densitometry in the Northern Manhattan Study," *Stroke*, vol. 44, pp. 457-461, 2013.
  - [46] J.-M. Davaine, T. Quillard, R. Brion, O. Lapérine, B. Guyomarch, T. Merlini, *et al.*, "Osteoprotegerin, pericytes and bone-like vascular calcification are associated with carotid plaque stability," *PLoS One*, vol. 9, p. e107642, 2014.
  - [47] A. Schiro, F. L. Wilkinson, R. Weston, J. V. Smyth, F. Serracino-Inglott, and M. Y. Alexander, "Elevated levels of endothelial-derived microparticles and serum CXCL9 and SCGF- $\beta$  are associated with unstable asymptomatic carotid plaques," *Scientific reports*, vol. 5, pp. 1-12, 2015.
